# Supplementary material for: Examining Factors Associated with the Use of Community Food Resources: An Application of the Andersen Model to Inform Future Interventions
Source: MDPI journal article supplement (doi:10.3390/ijerph21010076), 2024-01-09
Supplement: s1 [file s1]

**Figure S1. Anderson Behavioral Model Adapted for Use of Community Food Resources**

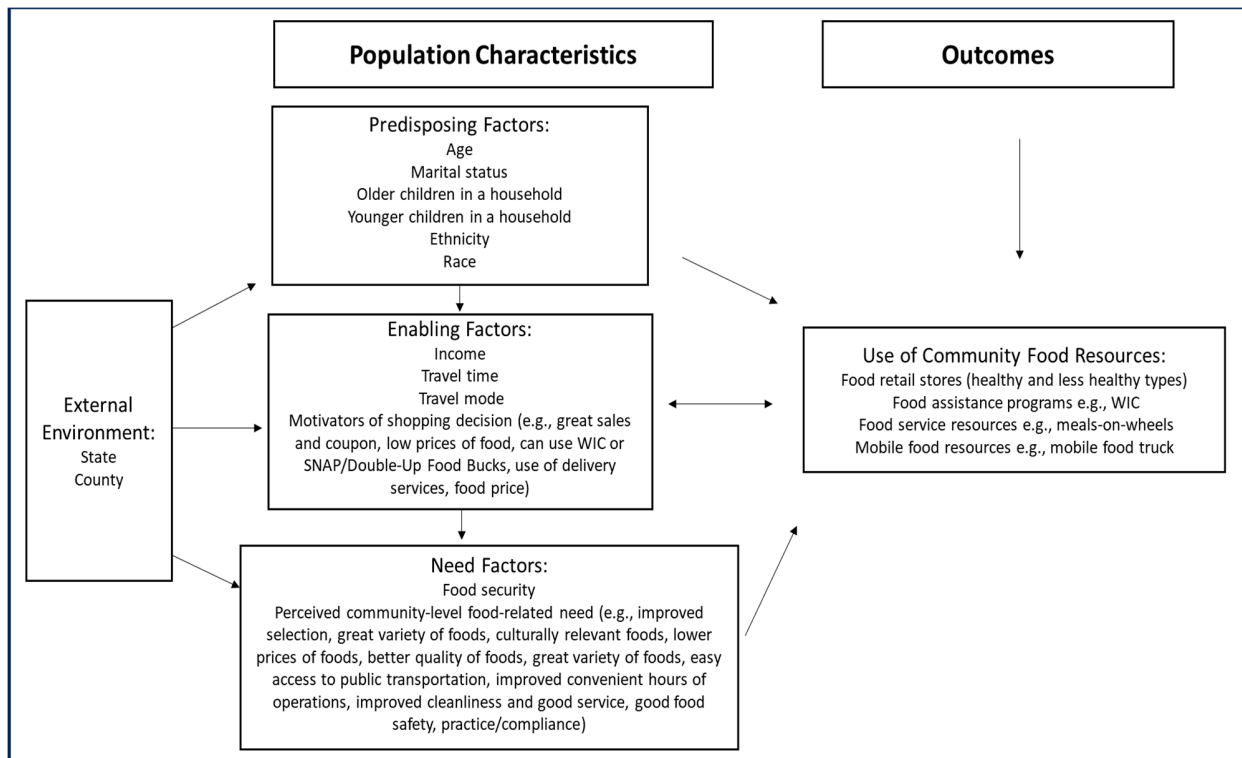

**Table S1. Summary of Predisposing, Enabling, Need Factors, and Use of Different Community Food Resources among Adults (N=1830)**

| Variables                                              | Mean (SD)   | Min-Max | %    |
|--------------------------------------------------------|-------------|---------|------|
| <b>Predisposing Factors</b>                            |             |         |      |
| <b>Age (years)</b>                                     | 37.9 (12.1) | 18-79   |      |
| <b>Gender</b>                                          |             |         |      |
| man                                                    |             |         | 41.0 |
| woman                                                  |             |         | 57.8 |
| others                                                 |             |         | 1.2  |
| <b>Education</b>                                       |             |         |      |
| up to high school                                      |             |         | 5.2  |
| up to college degree                                   |             |         | 18.0 |
| advanced degree                                        |             |         | 76.8 |
| <b>Marital Status</b>                                  |             |         |      |
| married                                                |             |         | 74.2 |
| separated                                              |             |         | 6.3  |
| widowed                                                |             |         | 1.2  |
| never married                                          |             |         | 18.3 |
| <b>Number of Adults in the Household (Hhd)</b>         |             |         |      |
| 1                                                      |             |         | 5.8  |
| 2                                                      |             |         | 20.0 |
| 3                                                      |             |         | 50.7 |
| 4                                                      |             |         | 14.4 |
| more than 5                                            |             |         | 9.1  |
| <b>Number of Older Children in the Hhd (5-17years)</b> |             |         |      |
| 0                                                      |             |         | 46.3 |
| 1                                                      |             |         | 38.2 |

|                                                            |           |
|------------------------------------------------------------|-----------|
| 2                                                          | 12.9      |
| 3                                                          | 1.7       |
| more than 4                                                | 0.9       |
| <b>Number of Younger Children in the Hhd (&lt;5 years)</b> |           |
| 0                                                          | 56.5      |
| 1                                                          | 36.7      |
| 2                                                          | 6.3       |
| more than 3                                                | 0.5       |
| <b>Ethnicity</b>                                           |           |
| Hispanic                                                   | 14.2      |
| non-Hispanic                                               | 85.8      |
| <b>Race</b>                                                |           |
| White/caucasian                                            | 87.6      |
| Black/African American                                     | 6.1       |
| Asian                                                      | 3.1       |
| Native Hawaiian/other pacific                              | 0.2       |
| American Indian                                            | 0.8       |
| multi-race                                                 | 2.3       |
| <b>Enabling Factors</b>                                    |           |
| <b>Travel Time (Minutes)</b>                               | 18.6 (18) |
| <b>Mode of Transportation</b>                              |           |
| walk/bicycle                                               | 5.5       |
| bus                                                        | 1.0       |
| private car                                                | 37.4      |
| friend/neighbor's car                                      | 5.0       |
| paid ride/home delivery                                    | 0.7       |
| multi-mode                                                 | 50.4      |
| <b>Neighborhood Type</b>                                   |           |
| urban                                                      | 56.6      |
| sub-urban                                                  | 34.7      |
| rural                                                      | 16.7      |
| <b>Income</b>                                              |           |
| below \$25,000                                             | 5.2       |
| \$25,000-\$49,999                                          | 27.7      |
| \$50,000-\$99,999                                          | 48.1      |
| \$100,000 and above                                        | 19.0      |
| <b>Shopping Decisions</b>                                  |           |
| <b>Great sales and coupons</b>                             |           |
| not at all important                                       | 5.8       |
| somewhat important                                         | 50.6      |
| very important                                             | 43.6      |
| <b>Low price of food</b>                                   |           |
| not at all important                                       | 5.1       |
| somewhat important                                         | 45.5      |
| very important                                             | 49.4      |
| <b>Could use of WIC or SNAP/Double-Up Food Bucks</b>       |           |
| not at all important                                       | 37.7      |
| somewhat important                                         | 38.9      |
| very important                                             | 23.4      |
| <b>Could use delivery services</b>                         |           |
| not at all important                                       | 27.6      |
| somewhat important                                         | 44.9      |
| very important                                             | 27.5      |
| <b>Rating of food prices</b>                               |           |
| very inexpensive                                           | 4.2       |
| not expensive                                              | 26.5      |
|                                                            | 59.4      |

|                                                             |             |     |      |
|-------------------------------------------------------------|-------------|-----|------|
| somewhat expensive                                          |             |     |      |
| <b>Need Factors</b>                                         |             |     |      |
| <b>Perceived Residents' Food-related Need</b>               |             |     |      |
| <b>Improved selection</b>                                   |             |     |      |
| agreed                                                      |             |     | 72.0 |
| neither agree nor disagree                                  |             |     | 17.5 |
| disagree                                                    |             |     | 10.5 |
| <b>Great variety of foods</b>                               |             |     |      |
| agreed                                                      |             |     | 68.6 |
| neither agree nor disagree                                  |             |     | 19.6 |
| disagree                                                    |             |     | 11.8 |
| <b>More cultural relevant foods</b>                         |             |     |      |
| agreed                                                      |             |     | 59.1 |
| neither agree nor disagree                                  |             |     | 25.4 |
| disagree                                                    |             |     | 15.5 |
| <b>Lower prices of foods</b>                                |             |     |      |
| agreed                                                      |             |     | 74.4 |
| neither agree nor disagree                                  |             |     | 18.9 |
| disagree                                                    |             |     | 6.7  |
| <b>Better quality foods</b>                                 |             |     |      |
| agreed                                                      |             |     | 68.5 |
| neither agree nor disagree                                  |             |     | 21.2 |
| disagree                                                    |             |     | 10.3 |
| <b>Easier access to public transportation and bus-stops</b> |             |     |      |
| agreed                                                      |             |     | 52.9 |
| neither agree nor disagree                                  |             |     | 28.8 |
| disagree                                                    |             |     | 18.3 |
| <b>Improved convenient hours of operation</b>               |             |     |      |
| agreed                                                      |             |     | 51.9 |
| neither agree nor disagree                                  |             |     | 27.7 |
| disagree                                                    |             |     | 20.4 |
| <b>Improved cleanliness and good service</b>                |             |     |      |
| agreed                                                      |             |     | 55.2 |
| neither agree nor disagree                                  |             |     | 26.5 |
| disagree                                                    |             |     | 18.4 |
| <b>Good food safety practice/compliance</b>                 |             |     |      |
| agreed                                                      |             |     | 56.8 |
| neither agree nor disagree                                  |             |     | 27.2 |
| disagree                                                    |             |     | 16.0 |
| <b>Use of Community Resources</b>                           |             |     |      |
| <b>Healthy Food Stores</b>                                  |             |     |      |
| supercenters                                                |             |     | 55.0 |
| supermarkets                                                |             |     | 66.0 |
| small grocery stores                                        |             |     | 41.0 |
| ethnic stores                                               |             |     | 10.7 |
| farmers'/fruits & vegetable market                          |             |     | 16.0 |
| healthy food retail composite score                         | 0.52 (0.50) | 0-1 |      |
| <b>Less Healthy Food Stores</b>                             |             |     |      |
| fast food restaurant                                        |             |     | 64.3 |
| corner or convenient stores                                 |             |     | 18.6 |
| convenience stores with gas station                         |             |     | 12.9 |
| dollar store                                                |             |     | 13.5 |
| vending machines                                            |             |     | 12.5 |
| less healthy food stores composite score                    | 0.77 (0.62) | 0-2 |      |

|                                                                               |             |     |      |
|-------------------------------------------------------------------------------|-------------|-----|------|
| <b>Food Assistance Program</b>                                                |             |     |      |
| food pantry or bank                                                           |             |     | 33.1 |
| community garden                                                              |             |     | 33.7 |
| friend's/relative's place                                                     |             |     | 53.2 |
| church or community centers                                                   |             |     | 14.7 |
| Special Supplemental Nutrition Program for Women, Infants, and Children (WIC) |             |     | 26.4 |
| Supplemental Nutrition Assistance Program (SNAP)/food stamps                  |             |     | 34.5 |
| food assistance composite score                                               | 1.96 (1.38) | 0-6 |      |
| <b>Food Services Resources</b>                                                |             |     |      |
| soup kitchen                                                                  |             |     | 33.0 |
| meals-on-the-wheels                                                           |             |     | 26.6 |
| national school lunch program                                                 |             |     | 23.7 |
| school breakfast program                                                      |             |     | 19.7 |
| summer food service program                                                   |             |     | 17.2 |
| food services composite score                                                 | 1.20 (1.38) | 0-1 |      |
| <b>Mobile Food Services Resources</b>                                         |             |     |      |
| mobile food truck                                                             |             |     | 32.2 |
| street food vendors                                                           |             |     | 36.5 |
| food stand                                                                    |             |     | 23.9 |
| mobile food services composite score                                          | 0.93 (0.98) | 0   |      |
